# Supplementary material for: Chitosan/reduced graphene oxide-modified spacer fabric as a salt-resistant solar absorber for efficient solar steam generation
Source: Royal Society of Chemistry journal article supplement (doi:10.1039/c9ta05859a), 2019-01-01
Supplement: c9ta05859a1.pdf [file c9ta05859a1.pdf]

## **Supporting Information for Journal of Materials Chemistry**

**A**

**Chitosan/Reduced Graphene Oxide Modified Spacer Fabric as Solar**

**Absorber for Efficient Solar Steam Generation**

*Fei Wang, Dongyuan Wei, Yuanzhen Li, Tao chen, Peng Mu, Hanxue Sun, Zhaoqi Zhu, Weidong Liang, An Li\**

### Calculation of the energy conversion efficiency

$$\eta = m h_{L,V} / C_{opt} q_i$$

where  $m$  is the mass flux of steam (the rate of water evaporation under the dark environment is subtracted),  $C_{opt}$  is the optical concentration,  $q_i$  is the nominal direct solar irradiation  $1 \text{ kW m}^{-2}$ ,  $h_{L,V}$  denotes total enthalpy of liquid-vapor phase change (including sensible heat and phase-change enthalpy), can be calculated as

$$h_{L,V} = \lambda + C\Delta T$$

where  $\lambda$  is latent heat of phase change (correspondence at different temperatures),  $C$  is specific heat capacity of water ( $4.2 \text{ kJ kg}^{-1} \text{ K}^{-1}$ ), and  $\Delta T$  denotes the temperature increase of the water.
